# Supplementary material for: Effect of fatty acids and triglycerides on the formation of lysine-derived advanced glycation end-products in model systems exposed to frying temperature
Source: Royal Society of Chemistry journal article supplement (doi:10.1039/c9ra01410a), 2019-01-01
Supplement: c9ra01410a1.pdf [file c9ra01410a1.pdf]

## Supplementary Information

**Table S1** Jet Stream electrospray ionization(ESI) source parameters for fructoselysine(Fru-Lys) detection

| Source parameter       | Setting  |
|------------------------|----------|
| Drying gas temperature | 300 °C   |
| Drying gas flow rate   | 10 L/min |
| Nebulizer pressure     | 25 psi   |
| Sheath gas temperature | 350 °C   |
| Sheath gas flow rate   | 9 L/min  |
| Nozzle voltage         | 450V     |
| capillary voltage      | 3500 V   |

**Table S2** The detailed MS parameters for fructoselysine detection

| Compound       | Precursor Ion | Product Ion | Dwell | Fragmentor | Collision Energy | Cell Accelerate Voltage | Polarity |
|----------------|---------------|-------------|-------|------------|------------------|-------------------------|----------|
| Fructoselysine | 309           | 84          | 200   | 70         | 17               | 3                       | Positive |
| Fructoselysine | 309           | 147         | 200   | 70         | 14               | 3                       | Positive |

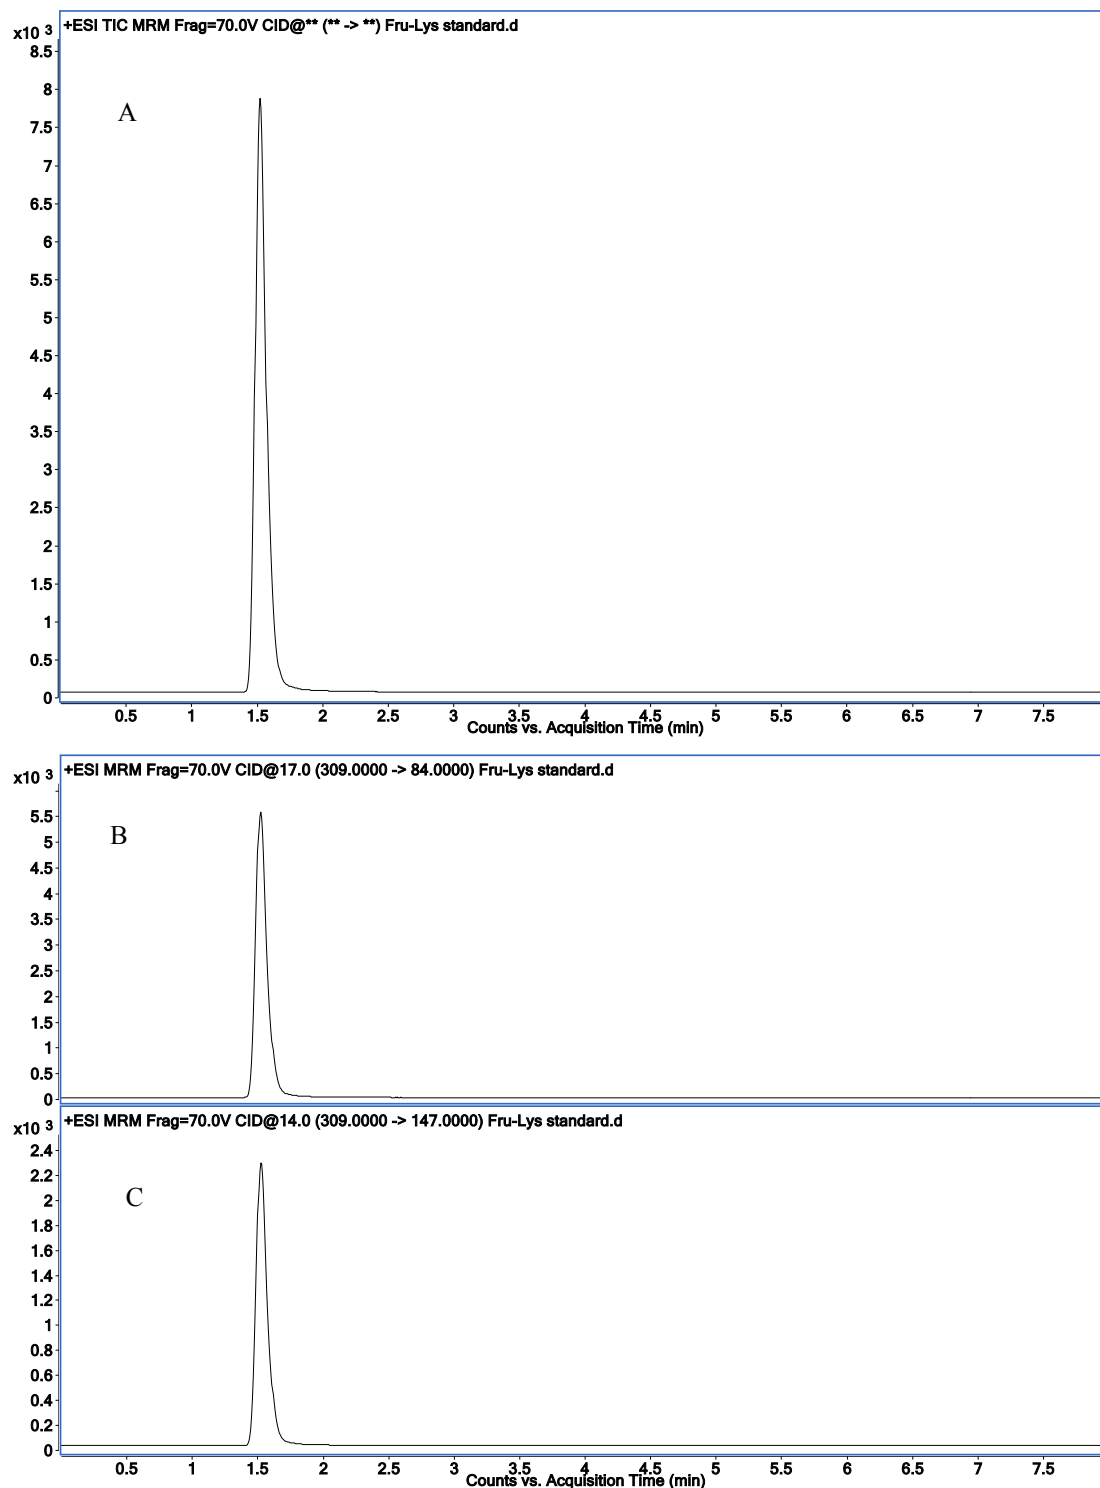

**Figure S1.** The total and extracted ion chromatograms of the monitored transition ions: (A) the total ion chromatograms of fructoselysine; (B) the extracted ion chromatogram of quantifying transition for fructoselysine  $m/z$  309 $\rightarrow$ 84; (C) the extracted ion chromatogram of quantifying transition for fructoselysine  $m/z$  309 $\rightarrow$ 147;

**Table S3** Jet Stream electrospray ionization(ESI) source parameters for CML, d<sub>4</sub>-CML, CEL and d<sub>4</sub>-CEL detection

| Source parameter       | Setting  |
|------------------------|----------|
| Drying gas temperature | 350 °C   |
| Drying gas flow rate   | 10 L/min |
| Nebulizer pressure     | 25 psi   |
| Sheath gas temperature | 300 °C   |
| Sheath gas flow rate   | 9 L/min  |
| Nozzle voltage         | 400V     |
| capillary voltage      | 3500 V   |

**Table S4** The detailed MS parameters for CML, d<sub>4</sub>- CML, CEL and d<sub>4</sub>- CEL detection

| Compound             | Precursor Ion | Product Ion | Dwell | Fragmentor | Collision Energy | Cell Accelerate Voltage | Polarity |
|----------------------|---------------|-------------|-------|------------|------------------|-------------------------|----------|
| CML                  | 205           | 84          | 50    | 60         | 12               | 3                       | Positive |
| CML                  | 205           | 130         | 50    | 60         | 10               | 3                       | Positive |
| d <sub>4</sub> - CML | 209           | 88          | 50    | 60         | 13               | 3                       | Positive |
| d <sub>4</sub> - CML | 209           | 134         | 50    | 60         | 9                | 3                       | Positive |
| CEL                  | 219           | 84          | 50    | 60         | 12               | 3                       | Positive |
| CEL                  | 219           | 130         | 50    | 60         | 10               | 3                       | Positive |
| d <sub>4</sub> - CEL | 223           | 88          | 50    | 60         | 13               | 3                       | Positive |
| d <sub>4</sub> - CEL | 223           | 134         | 50    | 60         | 11               | 3                       | Positive |

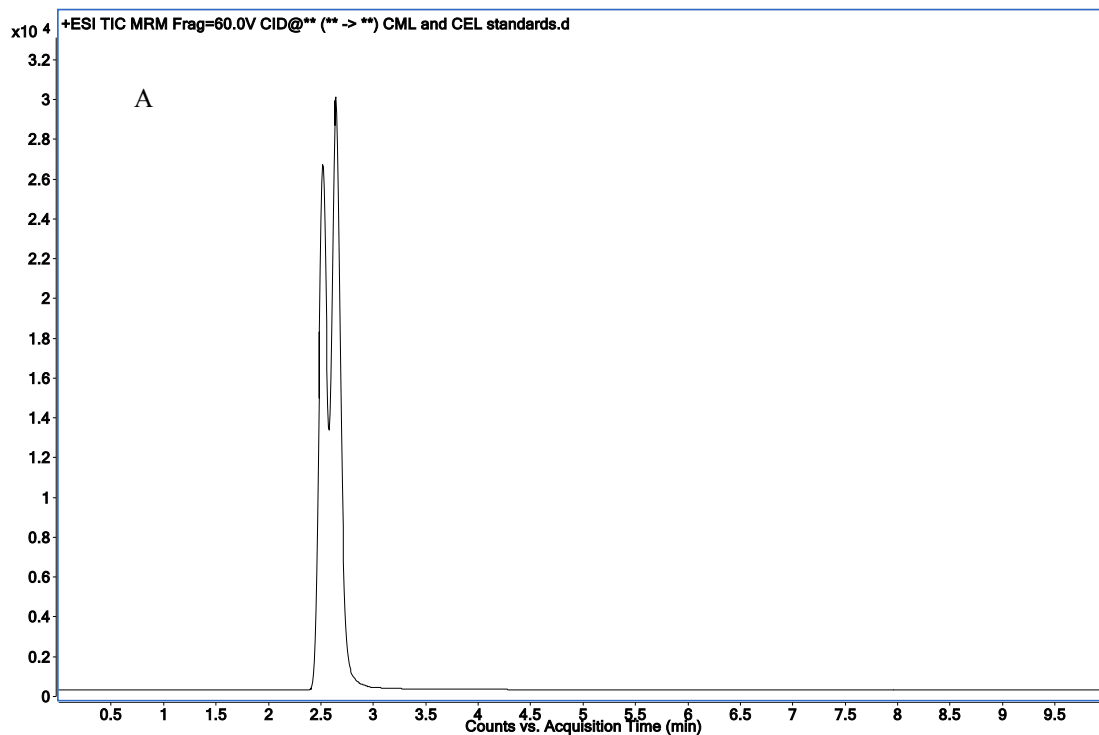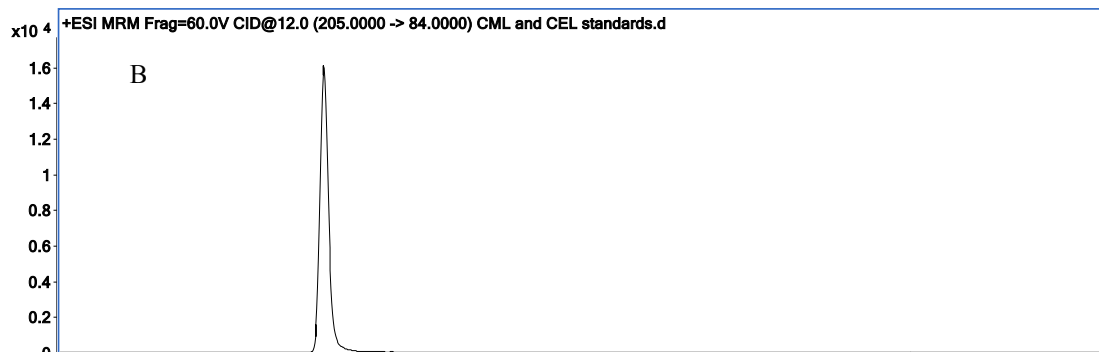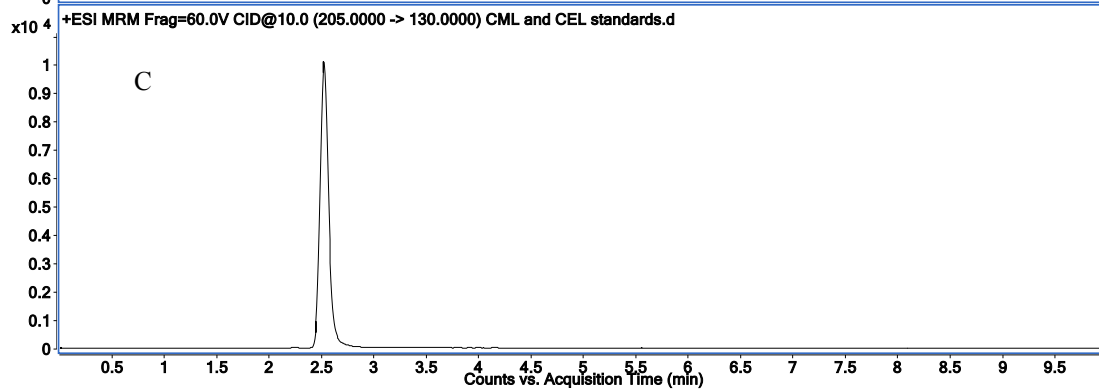

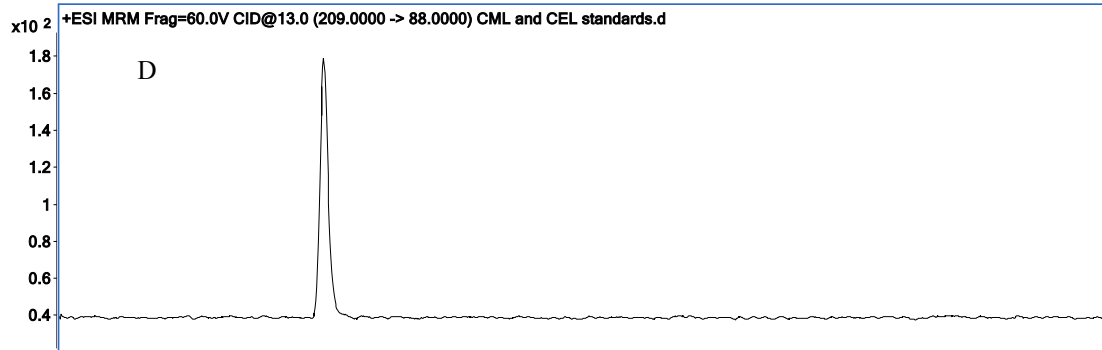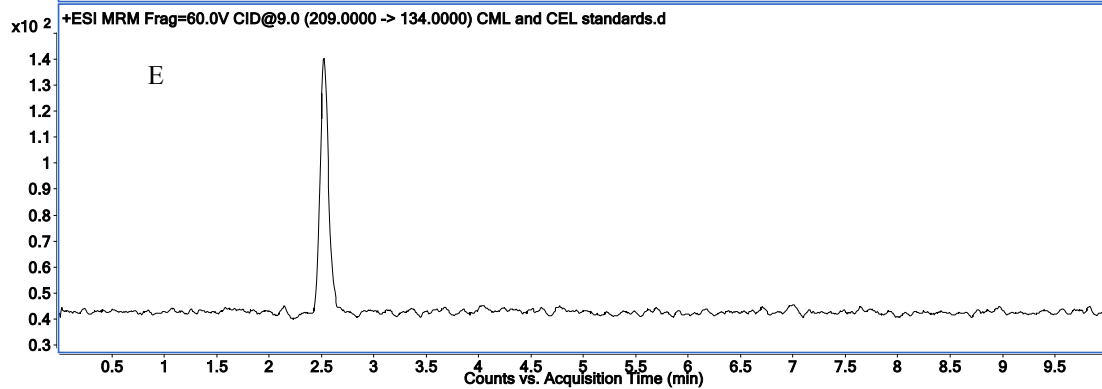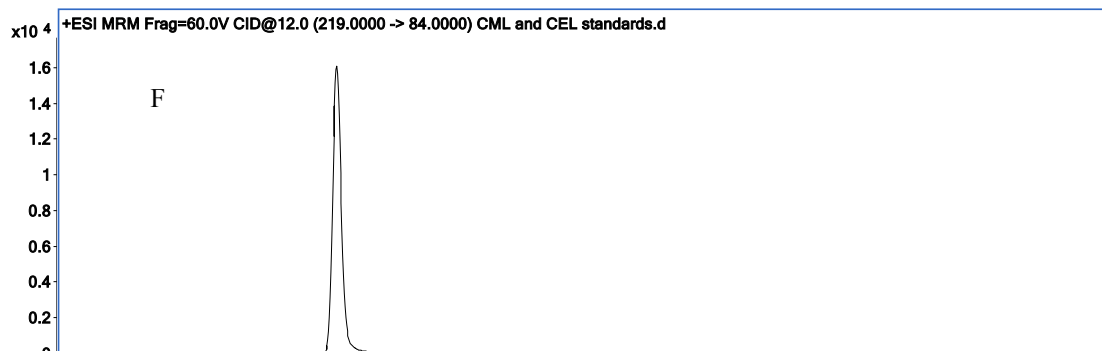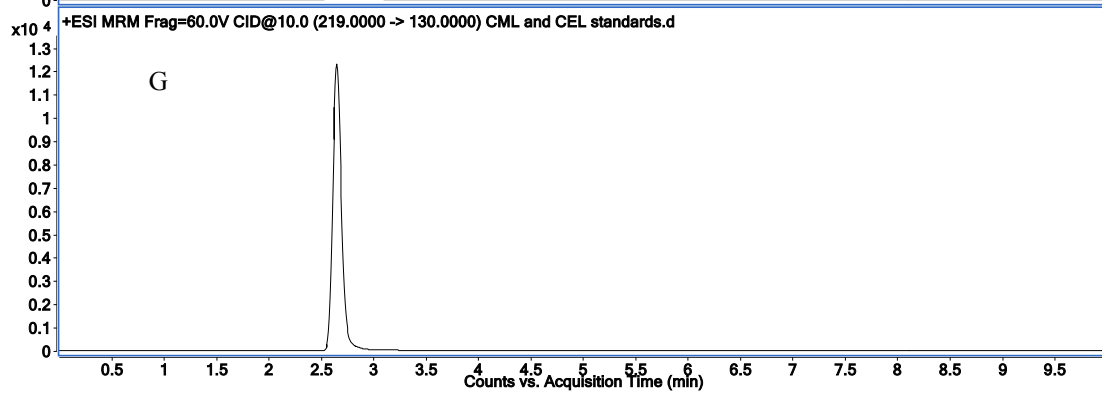

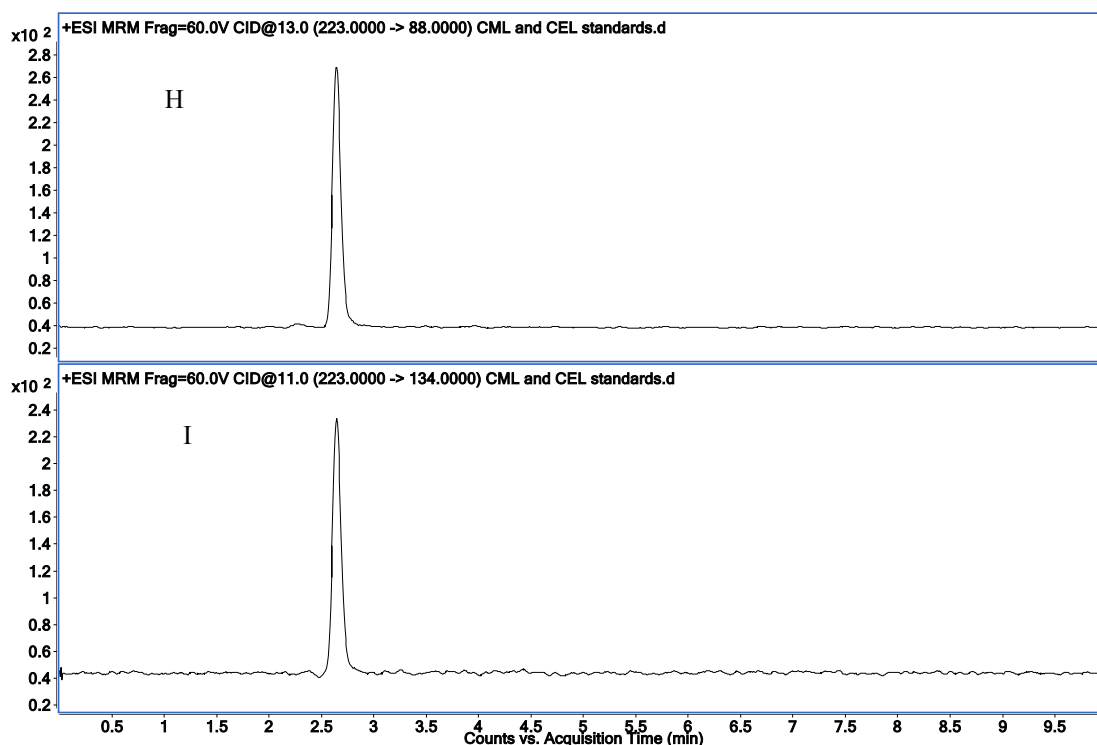

**Figure S2.** The total and extracted ion chromatograms of the monitored transition ions: (A) the total ion chromatograms of CML, d<sub>4</sub>-CML, CEL and d<sub>4</sub>-CEL mixed standards; (B) the extracted ion chromatogram of quantifying transition for CML m/z 205→84; (C) the extracted ion chromatogram of qualifying transition for CML m/z 205→130; (D) the extracted ion chromatogram of quantifying transition for d<sub>4</sub>-CML m/z 209→88; (E) the extracted ion chromatogram of qualifying transition for d<sub>4</sub>-CML m/z 209→134; (F) the extracted ion chromatogram of quantifying transition for CEL m/z 219→84; (G) the extracted ion chromatogram of qualifying transition for CEL m/z 219→130; (H) the extracted ion chromatogram of quantifying transition for d<sub>4</sub>-CEL m/z 223→88; (I) the extracted ion chromatogram of qualifying transition for d<sub>4</sub>-CEL m/z 223→134.

**Table S5** Jet Stream electrospray ionization(ESI) source parameters for pyrraline detection

| Source parameter       | Setting  |
|------------------------|----------|
| Drying gas temperature | 350 °C   |
| Drying gas flow rate   | 12 L/min |
| Nebulizer pressure     | 35 psi   |
| Sheath gas temperature | 350 °C   |
| Sheath gas flow rate   | 9 L/min  |
| Nozzle voltage         | 400V     |
| capillary voltage      | 3500 V   |

**Table S6** The detailed MS parameters for pyrraline detection

| Compound  | Precursor<br>Ion | Product<br>Ion | Dwell | Fragmentor | Collision<br>Energy | Cell<br>Accelerate<br>Voltage | Polarity |
|-----------|------------------|----------------|-------|------------|---------------------|-------------------------------|----------|
| Pyrraline | 255.1            | 175            | 200   | 60         | 6                   | 3                             | Positive |
| Pyrraline | 255.1            | 237            | 200   | 60         | 5                   | 3                             | Positive |

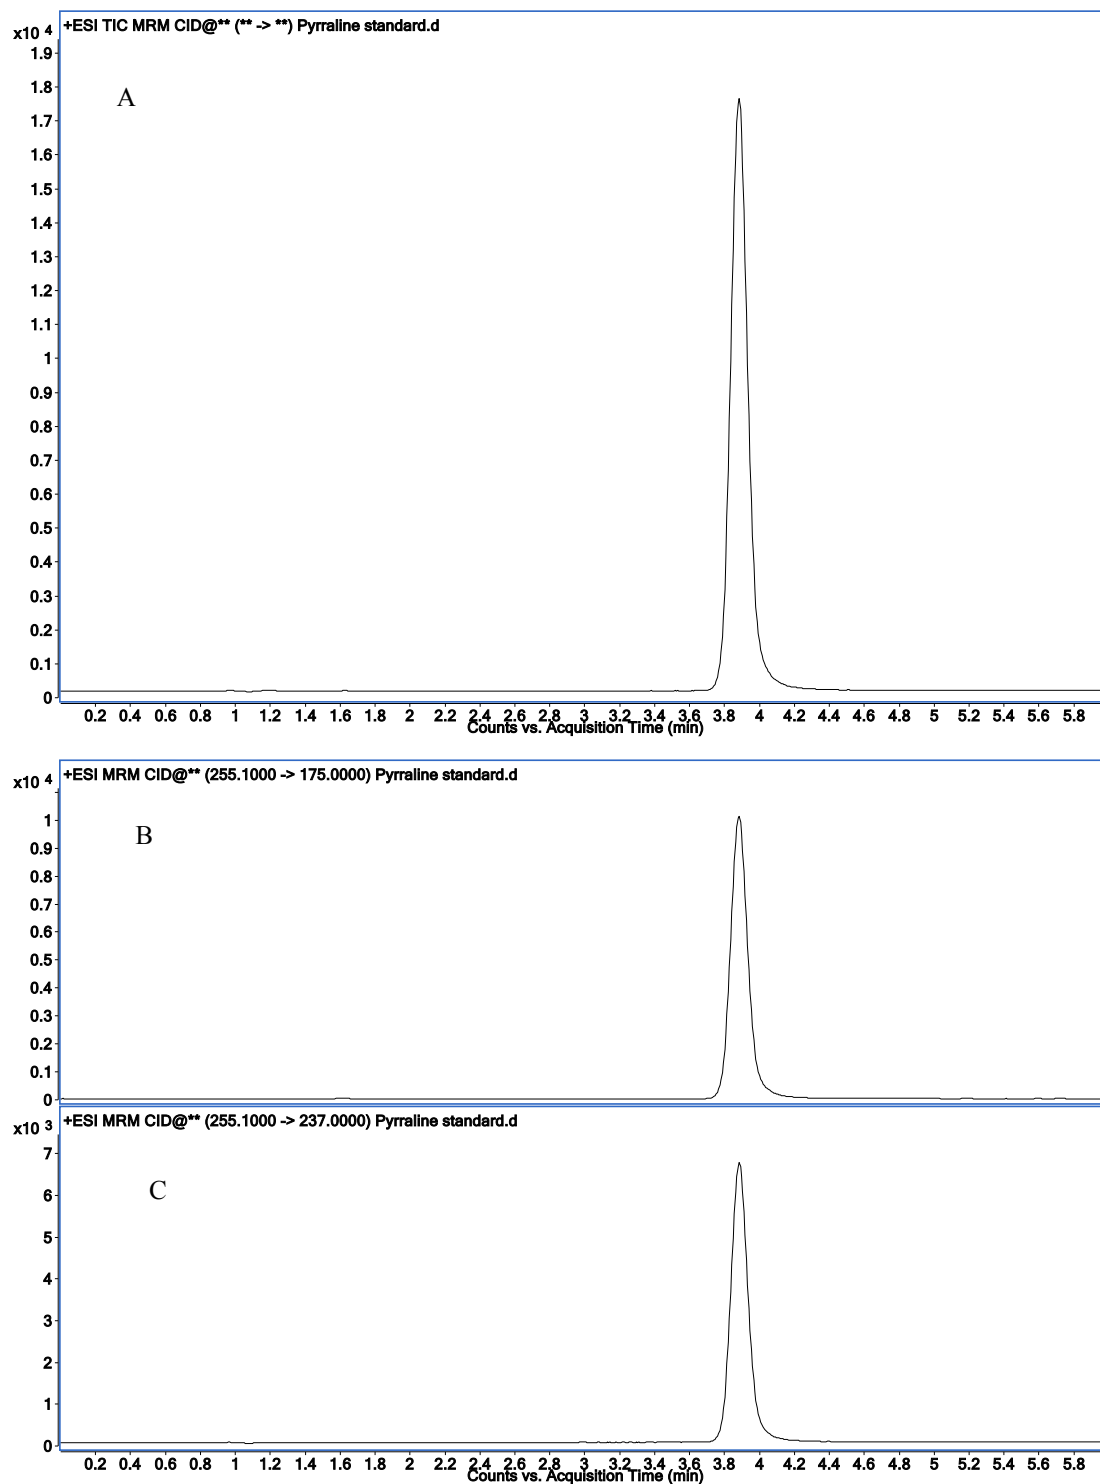

**Figure S3.** The total and extracted ion chromatograms of the monitored transition ions: (A) the total ion chromatograms pyrraline standard; (B) the extracted ion chromatogram of quantifying transition for pyrraline  $m/z$  255.1 $\rightarrow$ 175; (C) the extracted ion chromatogram of qualifying transition for pyrraline  $m/z$  255.1 $\rightarrow$ 237.
